# Supplementary material for: Association between end-of-life cancer care and immigrant status: a retrospective cohort study in Ontario, Canada
Source: HighWire-hosted journal article supplement (doi:10.1136/bmjopen-2020-042978), 2021-05-01
Supplement: bmjopen-2020-042978supp001_data_supplement.pdf [file bmjopen-2020-042978supp001_data_supplement.pdf]

**Supplementary Content****End-of-life cancer care: a cohort study of immigrants and long-term residents in Ontario, Canada**

Chu A, Barbera L, Sutradhar R, Erbas Oz U, O'Leary E, Seow H

**Supplementary table 1.** Data sources

**Supplementary table 2.** Quality indicator rates by ethnicity and immigrant status, 2004-2015

**Supplementary table 3.** Logistic regression models for aggressive care

**Supplementary table 4.** Logistic regression models for supportive care

**Supplementary table 1.** Data sources

| Data element                                  | Data source                                                              |
|-----------------------------------------------|--------------------------------------------------------------------------|
| <b>Baseline characteristics</b>               |                                                                          |
| Study population                              | Registrar General of Ontario Vital Statistics Database                   |
| Immigrant status and related data             | Immigration, Refugees and Citizenship Canada Permanent Resident Database |
| Age, sex, community of residence              | Registered Persons Database                                              |
| Community size, neighbourhood income quintile | Statistics Canada Postal Code Conversion File                            |
| Cancer type                                   | Ontario Cancer Registry                                                  |
| Charlson score                                | Canadian Institute for Health Information Discharge Abstract Database    |
| <b>Indicators</b>                             |                                                                          |
| Death in acute care hospital or bed           | Canadian Institute for Health Information Discharge Abstract Database    |
| New hospitalization within 30 days of death   | Canadian Institute for Health Information Discharge Abstract Database    |
| ICU admission within 30 days of death         | Canadian Institute for Health Information Discharge Abstract Database    |
| ≥ 1 ED visit within 30 days of death          | National Ambulatory Care Reporting System                                |
| Chemotherapy within 2 weeks of death          | Ontario Health Insurance Plan Physician Claims database                  |
| Home visits within 6 months of death          | Ontario's Home Care Database                                             |
| Physician house call within 2 weeks of death  | Ontario Health Insurance Plan Physician Claims database                  |

**Supplementary table 2.** Quality indicator rates by ethnicity and immigrant status, 2004-2015

| Indicator                                    | Ethnic Group  |                |                |                |                 |                 |                        |                        | All Immigrants*        | Long-term Residents | p-value† |
|----------------------------------------------|---------------|----------------|----------------|----------------|-----------------|-----------------|------------------------|------------------------|------------------------|---------------------|----------|
|                                              | Black         | East Asian     | Latin American | South Asian    | Southeast Asian | West Asian/Arab | White-Eastern European | White-Western European |                        |                     |          |
|                                              | n (%)         |                |                |                |                 |                 |                        |                        |                        |                     |          |
| Population size, n                           | 1052          | 2987           | 670            | 2180           | 1129            | 1028            | 2499                   | 1418                   | 13 085                 | 229 471             |          |
| Death in acute care hospital or bed‡         | 623<br>(59.2) | 1846<br>(61.8) | 367<br>(54.8)  | 1353<br>(62.1) | 681<br>(60.3)   | 632<br>(61.5)   | 1259<br>(50.4)         | 659<br>(46.5)          | 7493<br>(57.3)         | 111 544<br>(48.6)   | <0.001   |
| New hospitalization within 30 days of death  | 585<br>(64.6) | 1855<br>(69.1) | 369<br>(61.8)  | 1269<br>(66.8) | 695<br>(68.9)   | 632<br>(68.5)   | 1327<br>(58.4)         | 731<br>(55.6)          | 7532<br>(64.3)         | 121 559<br>(57.4)   | <0.001   |
| Eligible, n                                  | 906           | 2686           | 597            | 1899           | 1008            | 922             | 2272                   | 1314                   | 11 707                 | 211 618             |          |
| ICU admission within 30 days of death‡       | 124<br>(11.8) | 306<br>(10.2)  | 72<br>(10.7)   | 293<br>(13.4)  | 146<br>(12.9)   | 140<br>(13.6)   | 223<br>(8.9)           | 134<br>(9.4)           | 1455<br>(11.1)         | 19 097<br>(8.3)     |          |
| ≥ 1 ED visit within 30 days of death         | 566<br>(62.5) | 1580<br>(58.8) | 335<br>(56.1)  | 1189<br>(62.6) | 631<br>(62.6)   | 573<br>(62.1)   | 1248<br>(54.9)         | 699<br>(53.2)          | 6882<br>(58.8)         | 113 674<br>(53.7)   | <0.001   |
| Eligible, n                                  | 906           | 2686           | 597            | 1899           | 1008            | 922             | 2272                   | 1314                   | 11 707                 | 211 618             |          |
| Chemotherapy within 2 weeks of death‡        | 44<br>(4.2)   | 94<br>(3.1)    | 21<br>(3.1)    | 105<br>(4.8)   | 52<br>(4.6)     | 33<br>(3.2)     | 84<br>(3.4)            | 60<br>(4.2)            | 497-502<br>(3.80-3.84) | 7527<br>(3.3)       | 0.001    |
| Home visit within 6 months of death by a:    |               |                |                |                |                 |                 |                        |                        |                        |                     |          |
| Registered nurse                             | 697<br>(67.0) | 1787<br>(60.3) | 457<br>(69.1)  | 1420<br>(66.3) | 735<br>(65.9)   | 712<br>(69.8)   | 1712<br>(69.0)         | 1008<br>(71.8)         | 8606<br>(66.5)         | 147 512<br>(64.8)   | <0.001   |
| Personal support worker                      | 461<br>(44.3) | 1032<br>(34.8) | 295<br>(44.6)  | 923<br>(43.1)  | 408<br>(36.6)   | 438<br>(42.9)   | 927<br>(37.4)          | 599<br>(42.7)          | 5126<br>(39.6)         | 93 866<br>(41.3)    | <0.001   |
| Eligible, n                                  | 1040          | 2964           | 661            | 2143           | 1116            | 1020            | 2480                   | 1404                   | 12 947                 | 227 553             |          |
| For palliative care (fiscal year 2005+ only) | 446<br>(46.3) | 1190<br>(44.5) | 314<br>(51.5)  | 909<br>(46.0)  | 460<br>(44.7)   | 494<br>(52.2)   | 1157<br>(50.4)         | 665<br>(51.7)          | 5685<br>(47.8)         | 92 849<br>(45.9)    | <0.001   |
| Eligible, n                                  | 964           | 2674           | 610            | 1976           | 1028            | 946             | 2297                   | 1287                   | 11 897                 | 202,492             |          |
| Physician house call within 2 weeks of death | 187<br>(25.0) | 517<br>(22.8)  | 147<br>(30.2)  | 412<br>(25.9)  | 170<br>(20.4)   | 220<br>(28.3)   | 603<br>(30.4)          | 380<br>(32.5)          | 2661<br>(26.7)         | 50 860<br>(27.3)    | 0.21     |

|                  |               |                |               |               |               |               |                |               |                |                   |        |
|------------------|---------------|----------------|---------------|---------------|---------------|---------------|----------------|---------------|----------------|-------------------|--------|
| Eligible, n      | 748           | 2271           | 487           | 1591          | 833           | 777           | 1982           | 1169          | 9948           | 186 113           |        |
| Aggressive care§ | 172<br>(19.0) | 442<br>(16.5)  | 103<br>(17.3) | 383<br>(20.2) | 211<br>(20.9) | 192<br>(20.8) | 326<br>(14.3)  | 198<br>(15.1) | 2050<br>(17.5) | 29 087<br>(13.7)  | <0.001 |
| Eligible, n      | 906           | 2686           | 597           | 1899          | 1008          | 922           | 2272           | 1314          | 11 707         | 21 1618           |        |
| Supportive care  | 469<br>(48.7) | 1252<br>(46.8) | 333<br>(54.6) | 962<br>(48.7) | 479<br>(46.6) | 518<br>(54.8) | 1224<br>(53.3) | 715<br>(55.6) | 6006<br>(50.5) | 101 347<br>(50.0) | 0.36   |
| Eligible, n      | 964           | 2674           | 610           | 1976          | 1028          | 946           | 2297           | 1287          | 11 897         | 202 492           |        |

\* Includes 122 immigrants whose ethnicity could not be classified. A range is reported for chemotherapy within 2 weeks of death to suppress a count of < 6 in the unknown ethnicity group.

†p-value is for all immigrants versus long-term residents.

‡ Eligible population is the entire population.

§ Aggressive care is defined as having ≥2 emergency department visits, ≥2 new hospitalizations or an ICU admission within 30 days of death.

|| Supportive care is defined as having ≥1 physician house call within 2 weeks of death, or ≥1 palliative nursing or personal support worker home visit within 6 months of death.

ED, emergency department; ICU, intensive care unit.

**Supplementary table 3.** Logistic regression models for aggressive care\*

|                               |                        | Univariate  |              |             | Ethnic groups vs long-term residents |             |             | Immigrants vs long-term residents |             |             | Ethnic groups only |             |             |
|-------------------------------|------------------------|-------------|--------------|-------------|--------------------------------------|-------------|-------------|-----------------------------------|-------------|-------------|--------------------|-------------|-------------|
|                               |                        | OR†         | 95% CI       |             | OR†                                  | 95% CI      |             | OR†                               | 95% CI      |             | OR†                | 95% CI      |             |
|                               |                        |             | Lower        | Upper       |                                      | Lower       | Upper       |                                   | Lower       | Upper       |                    | Lower       | Upper       |
| Ethnicity                     | White-Eastern European | 1.05        | 0.93         | 1.18        | 0.90                                 | 0.79        | 1.01        | na                                | na          | na          | 0.94               | 0.75        | 1.16        |
|                               | White-Western European | 1.11        | 0.95         | 1.29        | 0.99                                 | 0.85        | 1.15        | na                                | na          | na          | Ref                | -           | -           |
|                               | Latin American         | <b>1.32</b> | <b>1.06</b>  | <b>1.63</b> | 1.12                                 | 0.90        | 1.38        | na                                | na          | na          | 1.15               | 0.87        | 1.51        |
|                               | East Asian             | <b>1.25</b> | <b>1.13</b>  | <b>1.38</b> | <b>1.13</b>                          | <b>1.02</b> | <b>1.25</b> | na                                | na          | na          | 1.12               | 0.91        | 1.37        |
|                               | Black                  | <b>1.47</b> | <b>1.25</b>  | <b>1.74</b> | 1.19                                 | 1.00        | 1.41        | na                                | na          | na          | 1.20               | 0.94        | 1.53        |
|                               | South Asian            | <b>1.58</b> | <b>1.42</b>  | <b>1.77</b> | <b>1.35</b>                          | <b>1.20</b> | <b>1.52</b> | na                                | na          | na          | <b>1.31</b>        | <b>1.07</b> | <b>1.62</b> |
|                               | Southeast Asian        | <b>1.65</b> | <b>1.42</b>  | <b>1.92</b> | <b>1.38</b>                          | <b>1.19</b> | <b>1.62</b> | na                                | na          | na          | <b>1.37</b>        | <b>1.08</b> | <b>1.72</b> |
|                               | West Asian/Arab        | <b>1.66</b> | <b>1.41</b>  | <b>1.94</b> | <b>1.41</b>                          | <b>1.20</b> | <b>1.66</b> | na                                | na          | na          | <b>1.46</b>        | <b>1.15</b> | <b>1.85</b> |
|                               | All immigrants         | <b>1.33</b> | <b>1.27</b>  | <b>1.40</b> | na                                   | na          | na          | <b>1.15</b>                       | <b>1.09</b> | <b>1.21</b> | na                 | na          | na          |
|                               | Long-term residents    | Ref         | -            | -           | Ref                                  | -           | -           | Ref                               | -           | -           | na                 | na          | na          |
| Age (per year)                |                        | <b>0.98</b> | <b>0.98</b>  | <b>0.98</b> | <b>0.98</b>                          | <b>0.98</b> | <b>0.98</b> | <b>0.98</b>                       | <b>0.98</b> | <b>0.98</b> | <b>0.98</b>        | <b>0.98</b> | <b>0.98</b> |
| Sex                           | Men                    | <b>1.30</b> | <b>1.27</b>  | <b>1.33</b> | <b>1.31</b>                          | <b>1.28</b> | <b>1.35</b> | <b>1.31</b>                       | <b>1.28</b> | <b>1.35</b> | <b>1.24</b>        | <b>1.11</b> | <b>1.38</b> |
|                               | Women                  | Ref         | -            | -           | Ref                                  | -           | -           | Ref                               | -           | -           | Ref                | -           | -           |
| Charlson score                | 1+                     | <b>0.94</b> | <b>0.91</b>  | <b>0.97</b> | 1.00                                 | 0.96        | 1.04        | 1.00                              | 0.97        | 1.04        | 0.95               | 0.81        | 1.11        |
|                               | 0 or missing           | Ref         | -            | -           | Ref                                  | -           | -           | Ref                               | -           | -           | 1.00               | -           | -           |
| Cancer type                   | Breast                 | <b>0.70</b> | <b>0.67</b>  | <b>0.74</b> | <b>0.77</b>                          | <b>0.72</b> | <b>0.81</b> | <b>0.77</b>                       | <b>0.73</b> | <b>0.81</b> | <b>0.78</b>        | <b>0.63</b> | <b>0.96</b> |
|                               | Colorectal             | <b>0.93</b> | <b>0.89</b>  | <b>0.97</b> | 0.98                                 | 0.94        | 1.02        | 0.98                              | 0.94        | 1.02        | <b>0.82</b>        | <b>0.67</b> | <b>0.99</b> |
|                               | Prostate               | <b>0.62</b> | <b>0.59</b>  | <b>0.66</b> | <b>0.67</b>                          | <b>0.63</b> | <b>0.71</b> | <b>0.67</b>                       | <b>0.63</b> | <b>0.71</b> | <b>0.51</b>        | <b>0.37</b> | <b>0.70</b> |
|                               | Other                  | <b>1.03</b> | <b>1.01</b>  | <b>1.06</b> | 1.03                                 | 1.00        | 1.06        | 1.03                              | 1.00        | 1.06        | 1.02               | 0.90        | 1.16        |
|                               | Lung                   | Ref         | -            | -           | Ref                                  | -           | -           | Ref                               | -           | -           | Ref                | -           | -           |
| Neighbourhood income quintile | 1 (lowest)             | <b>1.08</b> | <b>1.04</b>  | <b>1.12</b> | <b>1.05</b>                          | <b>1.01</b> | <b>1.10</b> | <b>1.06</b>                       | <b>1.01</b> | <b>1.10</b> | 1.05               | 0.88        | 1.26        |
|                               | 2                      | <b>1.05</b> | <b>1.01</b>  | <b>1.09</b> | 1.03                                 | 0.99        | 1.07        | 1.03                              | 0.99        | 1.07        | 1.11               | 0.92        | 1.33        |
|                               | 3                      | <b>1.06</b> | <b>1.02</b>  | <b>1.10</b> | 1.03                                 | 0.99        | 1.08        | 1.04                              | 0.99        | 1.08        | 1.01               | 0.84        | 1.22        |
|                               | 4                      | <b>1.04</b> | <b>1.003</b> | <b>1.09</b> | 1.02                                 | 0.98        | 1.06        | 1.02                              | 0.98        | 1.06        | 1.03               | 0.85        | 1.25        |
|                               | 5                      | Ref         | -            | -           | Ref                                  | -           | -           | Ref                               | -           | -           | Ref                | -           | -           |
| Community size                | < 10 000               | <b>1.20</b> | <b>1.16</b>  | <b>1.24</b> | <b>1.25</b>                          | <b>1.20</b> | <b>1.30</b> | <b>1.25</b>                       | <b>1.20</b> | <b>1.30</b> | 1.04               | 0.67        | 1.62        |

|               |                                     |             |             |             |             |             |             |             |             |             |             |             |             |
|---------------|-------------------------------------|-------------|-------------|-------------|-------------|-------------|-------------|-------------|-------------|-------------|-------------|-------------|-------------|
|               | 10 000-99 999                       | <b>1.17</b> | <b>1.13</b> | <b>1.21</b> | <b>1.25</b> | <b>1.20</b> | <b>1.30</b> | <b>1.25</b> | <b>1.19</b> | <b>1.30</b> | 1.27        | 0.82        | 1.98        |
|               | ≥ 100 000                           | Ref         | -           | -           |
| Health region | Erie St.Clair                       | 1.03        | 0.97        | 1.10        | 0.95        | 0.89        | 1.02        | 0.95        | 0.89        | 1.02        | 0.94        | 0.66        | 1.34        |
|               | South West                          | 1.13        | 1.06        | 1.20        | 1.02        | 0.96        | 1.08        | 1.02        | 0.96        | 1.09        | 0.94        | 0.65        | 1.38        |
|               | Waterloo                            | 1.05        | 0.98        | 1.12        | 1.01        | 0.94        | 1.08        | 1.01        | 0.95        | 1.08        | 1.16        | 0.86        | 1.56        |
|               | Wellington                          |             |             |             |             |             |             |             |             |             |             |             |             |
|               | Hamilton Niagara<br>Haldimand Brant | <b>0.94</b> | <b>0.89</b> | <b>0.99</b> | <b>0.94</b> | <b>0.89</b> | <b>0.99</b> | <b>0.94</b> | <b>0.89</b> | <b>0.99</b> | 1.12        | 0.87        | 1.44        |
|               | Central West                        | <b>1.25</b> | <b>1.16</b> | <b>1.34</b> | <b>1.15</b> | <b>1.07</b> | <b>1.23</b> | <b>1.16</b> | <b>1.08</b> | <b>1.25</b> | <b>1.34</b> | <b>1.09</b> | <b>1.66</b> |
|               | Mississauga Halton                  | 1.00        | 0.94        | 1.07        | 0.98        | 0.92        | 1.05        | 0.98        | 0.92        | 1.05        | 1.04        | 0.85        | 1.28        |
|               | Toronto Central                     | Ref         | -           | -           |
|               | Central                             | <b>1.17</b> | <b>1.10</b> | <b>1.24</b> | <b>1.16</b> | <b>1.09</b> | <b>1.23</b> | <b>1.16</b> | <b>1.09</b> | <b>1.23</b> | <b>1.20</b> | <b>1.01</b> | <b>1.43</b> |
|               | Central East                        | <b>1.10</b> | <b>1.04</b> | <b>1.16</b> | 1.03        | 0.97        | 1.09        | 1.04        | 0.98        | 1.10        | <b>1.30</b> | <b>1.08</b> | <b>1.57</b> |
|               | South East                          | <b>1.14</b> | <b>1.07</b> | <b>1.22</b> | 0.98        | 0.91        | 1.05        | 0.98        | 0.92        | 1.06        | 1.17        | 0.59        | 2.32        |
|               | Champlain                           | 0.95        | 0.90        | 1.01        | <b>0.88</b> | <b>0.83</b> | <b>0.93</b> | <b>0.88</b> | <b>0.83</b> | <b>0.94</b> | 1.03        | 0.80        | 1.34        |
|               | North Simcoe<br>Muskoka             | <b>1.11</b> | <b>1.03</b> | <b>1.19</b> | 0.96        | 0.89        | 1.04        | 0.96        | 0.89        | 1.04        | 1.33        | 0.76        | 2.35        |
|               | North East                          | <b>1.14</b> | <b>1.07</b> | <b>1.21</b> | 0.95        | 0.88        | 1.01        | 0.95        | 0.88        | 1.02        | 1.06        | 0.47        | 2.41        |
| North West    | <b>0.90</b>                         | <b>0.81</b> | <b>0.99</b> | <b>0.82</b> | <b>0.74</b> | <b>0.90</b> | <b>0.82</b> | <b>0.74</b> | <b>0.90</b> | 1.11        | 0.41        | 2.98        |             |
| Year of death | 2004                                | 1.00        | 0.94        | 1.07        | 0.97        | 0.91        | 1.04        | 0.97        | 0.91        | 1.04        | 0.92        | 0.70        | 1.20        |
|               | 2005                                | 0.95        | 0.89        | 1.01        | <b>0.93</b> | <b>0.87</b> | <b>0.99</b> | <b>0.93</b> | <b>0.87</b> | <b>0.99</b> | 0.90        | 0.69        | 1.18        |
|               | 2006                                | 0.95        | 0.89        | 1.01        | <b>0.92</b> | <b>0.87</b> | <b>0.98</b> | <b>0.92</b> | <b>0.87</b> | <b>0.98</b> | 1.05        | 0.82        | 1.35        |
|               | 2007                                | 0.99        | 0.93        | 1.06        | 0.97        | 0.91        | 1.03        | 0.97        | 0.91        | 1.03        | 1.03        | 0.80        | 1.31        |
|               | 2008                                | 1.02        | 0.96        | 1.08        | 1.00        | 0.94        | 1.06        | 1.00        | 0.94        | 1.06        | 0.88        | 0.69        | 1.12        |
|               | 2009                                | 0.99        | 0.93        | 1.05        | 0.97        | 0.91        | 1.03        | 0.97        | 0.91        | 1.03        | 0.96        | 0.76        | 1.22        |
|               | 2010                                | 0.97        | 0.91        | 1.03        | 0.95        | 0.89        | 1.01        | 0.95        | 0.89        | 1.01        | 0.90        | 0.70        | 1.14        |
|               | 2011                                | 0.98        | 0.92        | 1.04        | 0.97        | 0.91        | 1.03        | 0.97        | 0.91        | 1.03        | 0.86        | 0.68        | 1.09        |
|               | 2012                                | 0.99        | 0.93        | 1.06        | 0.97        | 0.92        | 1.04        | 0.97        | 0.92        | 1.04        | 1.04        | 0.83        | 1.30        |
|               | 2013                                | 0.96        | 0.90        | 1.03        | 0.95        | 0.89        | 1.02        | 0.95        | 0.89        | 1.02        | 0.94        | 0.72        | 1.22        |
|               | 2014                                | 0.94        | 0.88        | 1.01        | 0.94        | 0.88        | 1.01        | 0.94        | 0.88        | 1.01        | 0.94        | 0.73        | 1.22        |
| 2015          | Ref                                 | -           | -           | Ref         | -           | -           | Ref         | -           | -           | Ref         | -           | -           |             |
| Education     | > Secondary school                  | na          | 1.05        | 0.94        | 1.17        |
|               | Secondary school or<br>less         | na          | Ref         | -           | -           |

|                        |                           |    |    |    |    |    |    |    |    |    |      |      |      |
|------------------------|---------------------------|----|----|----|----|----|----|----|----|----|------|------|------|
| Language ability       | Neither English or French | na | 0.97 | 0.87 | 1.09 |
|                        | English and/or French     | na | Ref  | -    | -    |
| Time since immigration | < 5 years                 | na | 1.04 | 0.88 | 1.23 |
|                        | 5-10 years                | na | 0.99 | 0.86 | 1.13 |
|                        | > 10 years                | na | Ref  | -    | -    |
| Immigration category   | Economic                  | na | 1.03 | 0.91 | 1.18 |
|                        | Refugee or other          | na | 0.98 | 0.85 | 1.13 |
|                        | Family                    | na | Ref  | -    | -    |

\* Aggressive care is defined as having  $\geq 2$  emergency department visits,  $\geq 2$  new hospitalizations or an ICU admission within 30 days of death. Ethnic groups are listed in order of increasing receipt of aggressive care versus long-term residents. Immigrants of unknown ethnicity are excluded from analyses.

† Boldface type indicates significant values at  $p < 0.05$ .

CI=confidence interval, na=not applicable, OR=odds ratio.

Supplementary table 4. Logistic regression models for supportive care\*

|                               |                        | Univariate  |             |             | Ethnic groups vs long-term residents |             |             | Immigrants vs long-term residents |             |             | Ethnic groups only |             |             |
|-------------------------------|------------------------|-------------|-------------|-------------|--------------------------------------|-------------|-------------|-----------------------------------|-------------|-------------|--------------------|-------------|-------------|
|                               |                        | OR†         | 95% CI      |             | OR†                                  | 95% CI      |             | OR†                               | 95% CI      |             | OR†                | 95% CI      |             |
|                               |                        |             | Lower       | Upper       |                                      | Lower       | Upper       |                                   | Lower       | Upper       |                    | Lower       | Upper       |
| Ethnicity                     | Southeast Asian        | <b>0.87</b> | <b>0.77</b> | <b>0.99</b> | <b>0.75</b>                          | <b>0.66</b> | <b>0.85</b> | na                                | na          | na          | <b>0.68</b>        | <b>0.57</b> | <b>0.81</b> |
|                               | Black                  | 0.94        | 0.83        | 1.07        | <b>0.82</b>                          | <b>0.72</b> | <b>0.93</b> | na                                | na          | na          | <b>0.73</b>        | <b>0.61</b> | <b>0.87</b> |
|                               | East Asian             | <b>0.89</b> | <b>0.82</b> | <b>0.96</b> | <b>0.89</b>                          | <b>0.82</b> | <b>0.96</b> | na                                | na          | na          | <b>0.78</b>        | <b>0.67</b> | <b>0.90</b> |
|                               | South Asian            | 0.95        | 0.87        | 1.03        | 0.93                                 | 0.85        | 1.02        | na                                | na          | na          | <b>0.82</b>        | <b>0.70</b> | <b>0.96</b> |
|                               | White-Eastern European | <b>1.14</b> | <b>1.05</b> | <b>1.24</b> | 1.00                                 | 0.91        | 1.08        | na                                | na          | na          | 0.86               | 0.74        | 1.01        |
|                               | West Asian/Arab        | <b>1.22</b> | <b>1.07</b> | <b>1.38</b> | 1.07                                 | 0.93        | 1.22        | na                                | na          | na          | 0.94               | 0.79        | 1.14        |
|                               | Latin American         | <b>1.20</b> | <b>1.03</b> | <b>1.41</b> | 1.11                                 | 0.94        | 1.31        | na                                | na          | na          | 0.97               | 0.79        | 1.19        |
|                               | White-Western European | <b>1.25</b> | <b>1.12</b> | <b>1.39</b> | <b>1.16</b>                          | <b>1.03</b> | <b>1.30</b> | na                                | na          | na          | Ref                | -           | -           |
|                               | All immigrants         | 1.02        | 0.8         | 1.06        | na                                   | na          | na          | <b>0.95</b>                       | <b>0.91</b> | <b>0.98</b> | na                 | na          | na          |
|                               | Long-term residents    | Ref         | -           | -           | Ref                                  | -           | -           | Ref                               | -           | -           | na                 | na          | na          |
| Age (years)                   |                        | <b>0.98</b> | <b>0.98</b> | <b>0.98</b> | <b>0.98</b>                          | <b>0.98</b> | <b>0.98</b> | <b>0.98</b>                       | <b>0.98</b> | <b>0.98</b> | <b>0.99</b>        | <b>0.99</b> | <b>0.99</b> |
| Sex                           | Men                    | <b>0.92</b> | <b>0.90</b> | <b>0.93</b> | <b>0.92</b>                          | <b>0.90</b> | <b>0.93</b> | <b>0.92</b>                       | <b>0.90</b> | <b>0.93</b> | <b>0.84</b>        | <b>0.78</b> | <b>0.91</b> |
|                               | Women                  | Ref         | -           | -           | Ref                                  | -           | -           | Ref                               | -           | -           | Ref                | -           | -           |
| Charlson score                | 1+                     | <b>0.89</b> | <b>0.87</b> | <b>0.91</b> | <b>0.95</b>                          | <b>0.93</b> | <b>0.97</b> | <b>0.95</b>                       | <b>0.93</b> | <b>0.97</b> | 1.03               | 0.92        | 1.16        |
|                               | 0 or missing           | Ref         | -           | -           | Ref                                  | -           | -           | Ref                               | -           | -           | Ref                | -           | -           |
| Cancer type                   | Breast                 | <b>1.04</b> | <b>1.01</b> | <b>1.08</b> | 0.98                                 | 0.94        | 1.01        | 0.98                              | 0.94        | 1.01        | 1.01               | 0.86        | 1.18        |
|                               | Colorectal             | <b>0.92</b> | <b>0.89</b> | <b>0.95</b> | 0.99                                 | 0.96        | 1.02        | 0.99                              | 0.96        | 1.02        | 1.03               | 0.90        | 1.19        |
|                               | Prostate               | <b>0.84</b> | <b>0.80</b> | <b>0.87</b> | 1.01                                 | 0.98        | 1.05        | 1.01                              | 0.98        | 1.05        | 1.08               | 0.89        | 1.32        |
|                               | Other                  | <b>0.85</b> | <b>0.83</b> | <b>0.87</b> | <b>0.84</b>                          | <b>0.83</b> | <b>0.86</b> | <b>0.84</b>                       | <b>0.83</b> | <b>0.86</b> | <b>0.82</b>        | <b>0.74</b> | <b>0.90</b> |
|                               | Lung                   | Ref         | -           | -           | Ref                                  | -           | -           | Ref                               | -           | -           | Ref                | -           | -           |
| Neighbourhood income quintile | 1 (lowest)             | <b>0.74</b> | <b>0.72</b> | <b>0.76</b> | <b>0.74</b>                          | <b>0.72</b> | <b>0.76</b> | <b>0.74</b>                       | <b>0.72</b> | <b>0.76</b> | <b>0.84</b>        | <b>0.74</b> | <b>0.96</b> |
|                               | 2                      | <b>0.84</b> | <b>0.82</b> | <b>0.87</b> | <b>0.85</b>                          | <b>0.83</b> | <b>0.87</b> | <b>0.85</b>                       | <b>0.82</b> | <b>0.87</b> | <b>0.82</b>        | <b>0.71</b> | <b>0.93</b> |
|                               | 3                      | <b>0.87</b> | <b>0.85</b> | <b>0.90</b> | <b>0.88</b>                          | <b>0.86</b> | <b>0.91</b> | <b>0.88</b>                       | <b>0.86</b> | <b>0.91</b> | 0.96               | 0.83        | 1.10        |
|                               | 4                      | <b>0.93</b> | <b>0.91</b> | <b>0.96</b> | <b>0.93</b>                          | <b>0.90</b> | <b>0.95</b> | <b>0.93</b>                       | <b>0.90</b> | <b>0.95</b> | 0.91               | 0.79        | 1.05        |



|                |                                     |             |             |             |             |             |             |             |             |             |             |             |             |
|----------------|-------------------------------------|-------------|-------------|-------------|-------------|-------------|-------------|-------------|-------------|-------------|-------------|-------------|-------------|
|                | 5                                   | Ref         | -           | -           |
| Community size | < 10,000                            | <b>0.89</b> | <b>0.87</b> | <b>0.91</b> | <b>0.93</b> | <b>0.91</b> | <b>0.96</b> | <b>0.93</b> | <b>0.91</b> | <b>0.96</b> | 1.05        | 0.76        | 1.46        |
|                | 10,000-99,999                       | <b>0.95</b> | <b>0.93</b> | <b>0.98</b> | 0.99        | 0.96        | 1.02        | 0.99        | 0.96        | 1.02        | 0.94        | 0.67        | 1.32        |
|                | ≥ 100,000                           | Ref         | -           | -           |
| Health region  | Erie St.Clair                       | <b>1.37</b> | <b>1.30</b> | <b>1.43</b> | <b>1.34</b> | <b>1.28</b> | <b>1.41</b> | <b>1.35</b> | <b>1.28</b> | <b>1.41</b> | <b>1.33</b> | <b>1.03</b> | <b>1.72</b> |
|                | South West                          | <b>0.88</b> | <b>0.84</b> | <b>0.92</b> | <b>0.89</b> | <b>0.85</b> | <b>0.93</b> | <b>0.89</b> | <b>0.85</b> | <b>0.93</b> | 0.97        | 0.75        | 1.26        |
|                | Waterloo<br>Wellington              | <b>1.84</b> | <b>1.75</b> | <b>1.93</b> | <b>1.83</b> | <b>1.74</b> | <b>1.92</b> | <b>1.83</b> | <b>1.74</b> | <b>1.92</b> | <b>1.79</b> | <b>1.42</b> | <b>2.26</b> |
|                | Hamilton Niagara<br>Haldimand Brant | <b>1.24</b> | <b>1.19</b> | <b>1.28</b> | <b>1.24</b> | <b>1.19</b> | <b>1.29</b> | <b>1.24</b> | <b>1.19</b> | <b>1.29</b> | 1.18        | 0.97        | 1.42        |
|                | Central West                        | <b>0.92</b> | <b>0.87</b> | <b>0.97</b> | <b>0.87</b> | <b>0.83</b> | <b>0.92</b> | <b>0.87</b> | <b>0.82</b> | <b>0.92</b> | 0.93        | 0.79        | 1.10        |
|                | Mississauga Halton                  | <b>1.27</b> | <b>1.21</b> | <b>1.32</b> | <b>1.20</b> | <b>1.15</b> | <b>1.26</b> | <b>1.20</b> | <b>1.14</b> | <b>1.25</b> | <b>1.19</b> | <b>1.03</b> | <b>1.38</b> |
|                | Toronto Central                     | Ref         | -           | -           |
|                | Central                             | 1.02        | 0.98        | 1.07        | 1.01        | 0.97        | 1.06        | 1.01        | 0.97        | 1.05        | 1.02        | 0.90        | 1.16        |
|                | Central East                        | 1.02        | 0.98        | 1.06        | 1.03        | 0.99        | 1.07        | 1.03        | 0.99        | 1.07        | 0.96        | 0.83        | 1.10        |
|                | South East                          | <b>0.88</b> | <b>0.84</b> | <b>0.93</b> | 0.90        | 0.86        | 0.95        | <b>0.91</b> | <b>0.86</b> | <b>0.95</b> | 0.65        | 0.39        | 1.08        |
|                | Champlain                           | <b>1.47</b> | <b>1.41</b> | <b>1.53</b> | <b>1.45</b> | <b>1.39</b> | <b>1.51</b> | <b>1.45</b> | <b>1.39</b> | <b>1.51</b> | <b>1.61</b> | <b>1.33</b> | <b>1.96</b> |
|                | North Simcoe<br>Muskoka             | <b>1.29</b> | <b>1.23</b> | <b>1.36</b> | <b>1.30</b> | <b>1.23</b> | <b>1.37</b> | <b>1.30</b> | <b>1.23</b> | <b>1.37</b> | 1.24        | 0.80        | 1.94        |
|                | North East                          | 0.96        | 0.91        | 1.00        | 0.97        | 0.93        | 1.02        | 0.97        | 0.93        | 1.02        | 1.44        | 0.77        | 2.71        |
| North West     | <b>0.63</b>                         | <b>0.59</b> | <b>0.67</b> | <b>0.62</b> | <b>0.58</b> | <b>0.67</b> | <b>0.62</b> | <b>0.58</b> | <b>0.67</b> | 1.53        | 0.72        | 3.23        |             |
| Year of death  | 2005                                | <b>0.59</b> | <b>0.57</b> | <b>0.62</b> | <b>0.56</b> | <b>0.54</b> | <b>0.59</b> | <b>0.56</b> | <b>0.54</b> | <b>0.59</b> | <b>0.62</b> | <b>0.51</b> | <b>0.77</b> |
|                | 2006                                | <b>0.67</b> | <b>0.64</b> | <b>0.70</b> | <b>0.64</b> | <b>0.61</b> | <b>0.67</b> | <b>0.64</b> | <b>0.61</b> | <b>0.67</b> | <b>0.56</b> | <b>0.46</b> | <b>0.67</b> |
|                | 2007                                | <b>0.67</b> | <b>0.65</b> | <b>0.70</b> | <b>0.65</b> | <b>0.62</b> | <b>0.67</b> | <b>0.65</b> | <b>0.62</b> | <b>0.67</b> | <b>0.62</b> | <b>0.51</b> | <b>0.74</b> |
|                | 2008                                | <b>0.67</b> | <b>0.64</b> | <b>0.69</b> | <b>0.64</b> | <b>0.61</b> | <b>0.67</b> | <b>0.64</b> | <b>0.61</b> | <b>0.67</b> | <b>0.62</b> | <b>0.52</b> | <b>0.74</b> |
|                | 2009                                | <b>0.70</b> | <b>0.67</b> | <b>0.73</b> | <b>0.67</b> | <b>0.64</b> | <b>0.70</b> | <b>0.67</b> | <b>0.65</b> | <b>0.70</b> | <b>0.73</b> | <b>0.61</b> | <b>0.87</b> |
|                | 2010                                | <b>0.74</b> | <b>0.71</b> | <b>0.77</b> | <b>0.72</b> | <b>0.69</b> | <b>0.75</b> | <b>0.72</b> | <b>0.69</b> | <b>0.75</b> | <b>0.77</b> | <b>0.64</b> | <b>0.91</b> |
|                | 2011                                | <b>0.77</b> | <b>0.74</b> | <b>0.80</b> | <b>0.75</b> | <b>0.72</b> | <b>0.78</b> | <b>0.75</b> | <b>0.72</b> | <b>0.78</b> | <b>0.89</b> | <b>0.75</b> | <b>1.05</b> |
|                | 2012                                | <b>0.77</b> | <b>0.74</b> | <b>0.81</b> | <b>0.76</b> | <b>0.72</b> | <b>0.79</b> | <b>0.76</b> | <b>0.72</b> | <b>0.79</b> | <b>0.86</b> | <b>0.73</b> | <b>1.02</b> |
|                | 2013                                | <b>0.85</b> | <b>0.81</b> | <b>0.89</b> | <b>0.85</b> | <b>0.81</b> | <b>0.89</b> | <b>0.85</b> | <b>0.81</b> | <b>0.89</b> | <b>0.73</b> | <b>0.60</b> | <b>0.88</b> |
|                | 2014                                | <b>0.92</b> | <b>0.87</b> | <b>0.96</b> | <b>0.91</b> | <b>0.87</b> | <b>0.96</b> | <b>0.91</b> | <b>0.87</b> | <b>0.96</b> | <b>0.87</b> | <b>0.72</b> | <b>1.06</b> |
|                | 2015                                | Ref         | -           | -           |

|                        |                           |    |    |    |    |    |    |    |    |    |             |             |             |
|------------------------|---------------------------|----|----|----|----|----|----|----|----|----|-------------|-------------|-------------|
| Education              | > Secondary school        | na | 1.04        | 0.95        | 1.13        |
|                        | Secondary school or less  | na | Ref         | -           | -           |
| Language ability       | Neither English or French | na | 1.01        | 0.92        | 1.10        |
|                        | English and/or French     | na | Ref         | -           | -           |
| Time since immigration | < 5 years                 | na | <b>0.85</b> | <b>0.75</b> | <b>0.97</b> |
|                        | 5-10 years                | na | 0.98        | 0.88        | 1.10        |
|                        | > 10 years                | na | Ref         | -           | -           |
| Immigration category   | Economic                  | na | 1.02        | 0.92        | 1.14        |
|                        | Refugee or other          | na | 1.03        | 0.92        | 1.15        |
|                        | Family                    | na | Ref         | -           | -           |

\* Supportive care is defined as  $\geq 1$  physician house call within 2 weeks of death, or  $\geq 1$  palliative nursing or personal support worker home visit within 6 months of death. Ethnic groups are listed in order of increasing receipt of supportive care versus long-term residents. Immigrants of unknown ethnicity are excluded from analyses. Deaths in 2004 are excluded as home care data is only available from April 2005.

† Boldface type indicates significant values at  $p < 0.05$ .

CI, confidence interval; na, not applicable; OR, odds ratio.
